# Supplementary material
Source: publisher figshare collection journal article supplement (https://frontiersin.figshare.com/ndownloader/files/28513563)
Supplement: Supplementary file [file 28513563]

## **Supplementary Material**

### **Impact of the expression system on recombinant protein production in *E. coli* BL21**

Gema Lozano-Terol<sup>+</sup>, Julia Gallego-Jara<sup>+</sup>, Rosa A. Sola-Martínez, Adrián Martínez Vivancos, Manuel Cánovas Díaz and Teresa de Diego Puente<sup>\*</sup>

Department of Biochemistry and Molecular Biology and Immunology (B), Faculty of Chemistry, University of Murcia, Campus of Espinardo, Regional Campus of International Excellence “Campus Mare Nostrum”, P.O. Box 4021, Murcia E-30100, Spain.

<sup>+</sup>These authors contributed equally to this article

<sup>\*</sup>Corresponding author (Email: [tdp@um.es](mailto:tdp@um.es) ; Tel.: +34868887397; Fax: +34968364148)

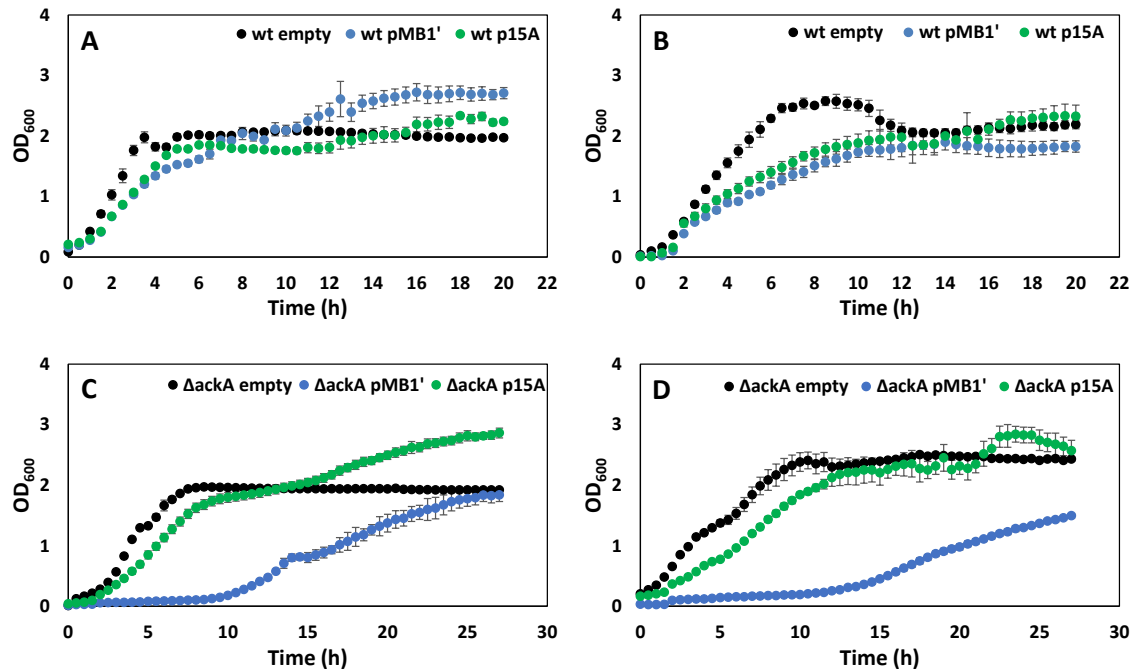

**Figure S1.** *E. coli* BL21 wt and  $\Delta ackA$  strains without any plasmid (empty) and containing the high (pMB1') and low (p15A) copy number expression vectors without any promoter grown at OD<sub>600</sub>. **A.** *E. coli* BL21 wt empty or containing vectors growing in TB7 supplemented with glucose. **B.** *E. coli* BL21 wt empty or containing vectors growing in TB7 supplemented with glycerol. **C.** *E. coli* BL21  $\Delta ackA$  empty or containing vectors growing in TB7 supplemented with glucose. **D.** *E. coli* BL21  $\Delta ackA$  empty or containing vectors growing in TB7 supplemented with glycerol.

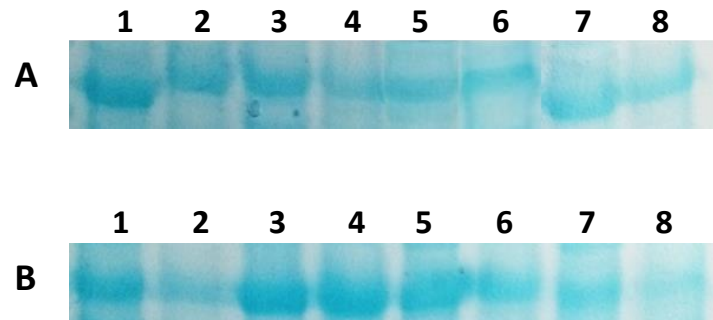

**Figure S2.** Electrophoresis SDS-PAGE gels of soluble/insoluble protein fractions corresponding to YFP. **A.** Fractions with soluble/insoluble YFP expressed with high copy number expression vectors (pSF-pMB1'-YFP). **B.** Fractions with soluble/insoluble YFP expressed with high copy number expression vectors (pSF-p15A-YFP). **Lane 1**, soluble YFP fraction expressed under  $P_{T7lac}$  control. **Lane 2**, insoluble YFP fraction expressed under  $P_{T7lac}$  control. **Lane 3**, soluble YFP fraction expressed under  $P_{trc}$  control. **Lane 4**, insoluble YFP fraction expressed under  $P_{trc}$  control. **Lane 5**, soluble YFP fraction expressed under  $P_{tac}$  control. **Lane 6**, insoluble YFP fraction expressed under  $P_{tac}$  control. **Lane 7**, soluble YFP fraction expressed under  $P_{BAD}$  control. **Lane 8**, insoluble YFP fraction expressed under  $P_{BAD}$  control.
